# Supplementary material for: Construction of a hydrophilic porphyrin-based MOF@COF hybrid via post-synthetic modification for N-glycopeptides analysis in human serum
Source: Royal Society of Chemistry journal article supplement (doi:10.1039/d4ay01791a), 2024-01-01
Supplement: d4ay01791a1.pdf [file d4ay01791a1.pdf]

## Supplementary Information

### **Construction of a hydrophilic porphyrin-based MOF@COF hybrid via post-synthetic modification for N-glycopeptides analysis in human serum**

Dongping Rao<sup>a</sup>, Luyan Meng<sup>c</sup>, Xiuqin Sheng<sup>c</sup>, Wenying Yu<sup>b\*</sup>, Chuan-Fan Ding<sup>c</sup>,  
Yinghua Yan<sup>c\*</sup>

*<sup>a</sup>Women and Children's Hospital of Ningbo University, Ningbo, 315012, China*

*<sup>b</sup>Ningbo Clinical Pathology Diagnosis Center, Ningbo, 315021, China*

*<sup>c</sup>School of Materials Science and Chemical Engineering, Ningbo 315211, China*

\*Corresponding author: Wenying Yu, Yinghua Yan

E-mail: yuwenying.wwy@126.com, yanyinghua@nbu.edu.cn

## **Characterization**

Scanning electron microscopy (SEM) was characterized by Keol 2012 microscope. Transmission electron microscopy (TEM) was characterized by JEOL 1011 microscopy (Japan). Fourier transform infrared spectra (FT-IR) was characterized by Thermo Fisher Scientific 10 infrared spectrometer analysis. Matrix-assisted laser desorption ionization time-of-flight mass spectrometry (MALDI-TOF MS) was used in an autoflex max (Bruker, USA). Nanoflow liquid chromatography–tandem mass spectrometry (Nano-LC-MS/MS) was used in Thermo Scientific TM Orbitrap Fusion Lumos (Thermo Scientific, USA).

### **Tryptic digestion of the standard proteins and actual sample.**

HRP (1 mg) and BSA (2 mg) were dissolved in 100  $\mu$ L of deionized water. After 10 minutes of ultrasound, the protein was denatured in boiling water at 100 °C for 10 minutes. Then 100  $\mu$ L of ammonium bicarbonate (50 mM) was added together with the addition of trypsin at protein to trypsin ratio of 40: 1 and incubated the solution for 16 h at 37 °C to fully digest the protein. The obtained solution is collected in a centrifuge tube and stored at -20 °C for further use.

Serum (1 mg) was diluted in  $\text{NH}_4\text{HCO}_3$  (50 mM) buffer and denatured in boiling water at 100 °C for 10 minutes. The mixture was reduced with DTT (200 mM) and  $\text{NH}_4\text{HCO}_3$  (50 mM) at 37 °C for 1 h and alkylated with IAA (400 mM) and  $\text{NH}_4\text{HCO}_3$  (50 mM) at 37 °C for 1 h in the dark. Then, the resulting mixture was incubated with trypsin (trypsin/protein is 1/40, w/w) at 37 °C for 16 h. Tryptic digests were lyophilized for further enrichment and analysis.

### **MALDI-TOF MS, nano-LC-MS/MS and data analysis.**

This part of data search and analysis refers to our group's previous work, and the specific information can be found in References<sup>2</sup> and 18.

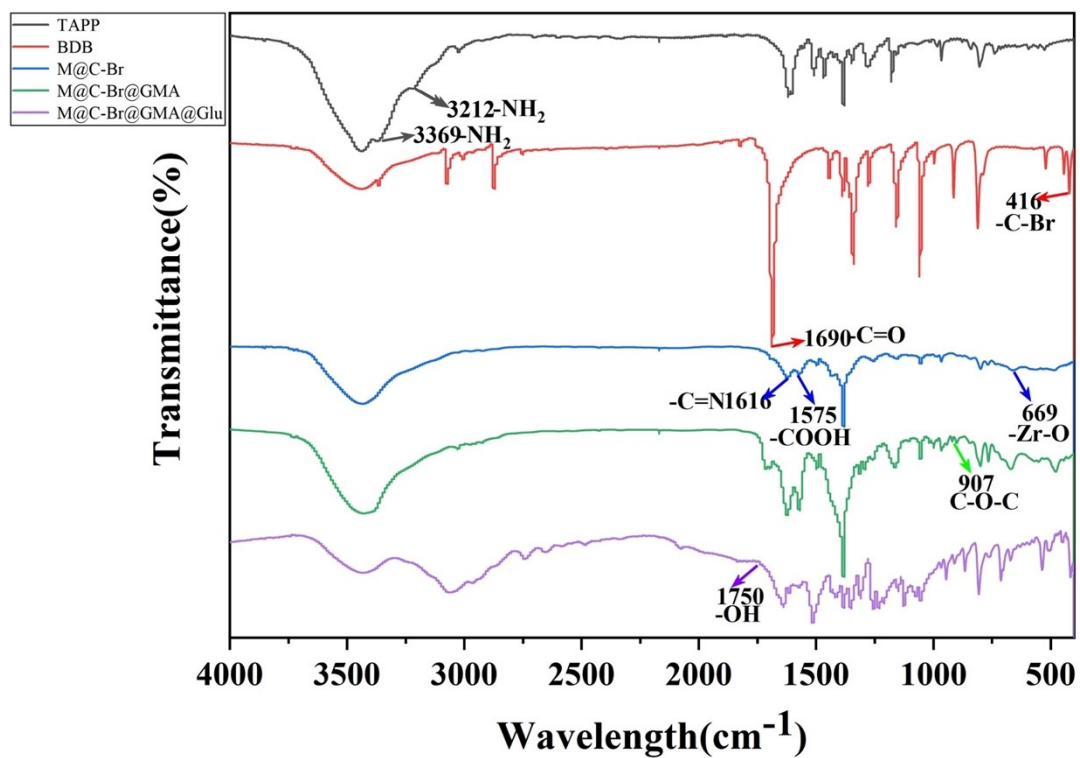

**Fig. S1.** The FT-IR spectra of TAPBB, BDB, M@C-Br, M@C-Br@GMA, and M@C-Br@GMA@Glu.

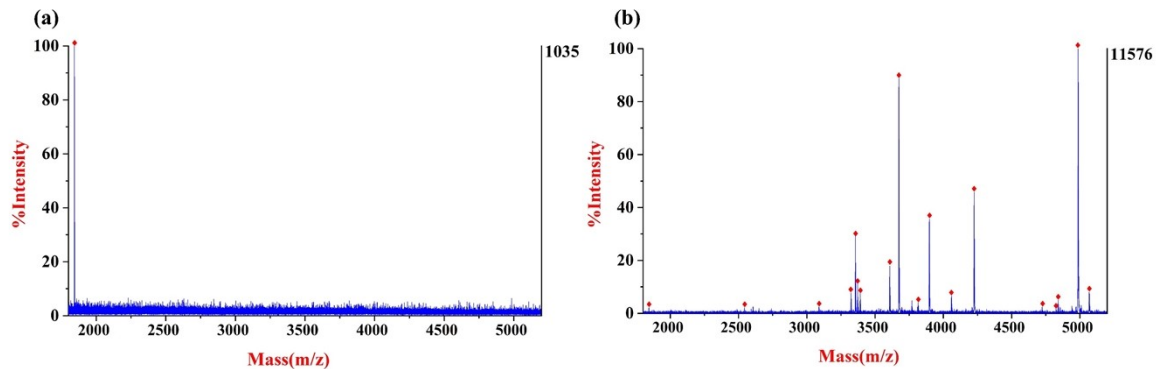

**Fig. S2.** MALDI-TOF mass spectra of HRP digests (a) before enrichment and (b) after enrichment with M@C-Br@GMA@Glu, glycopeptides peaks are signed as “◆”.

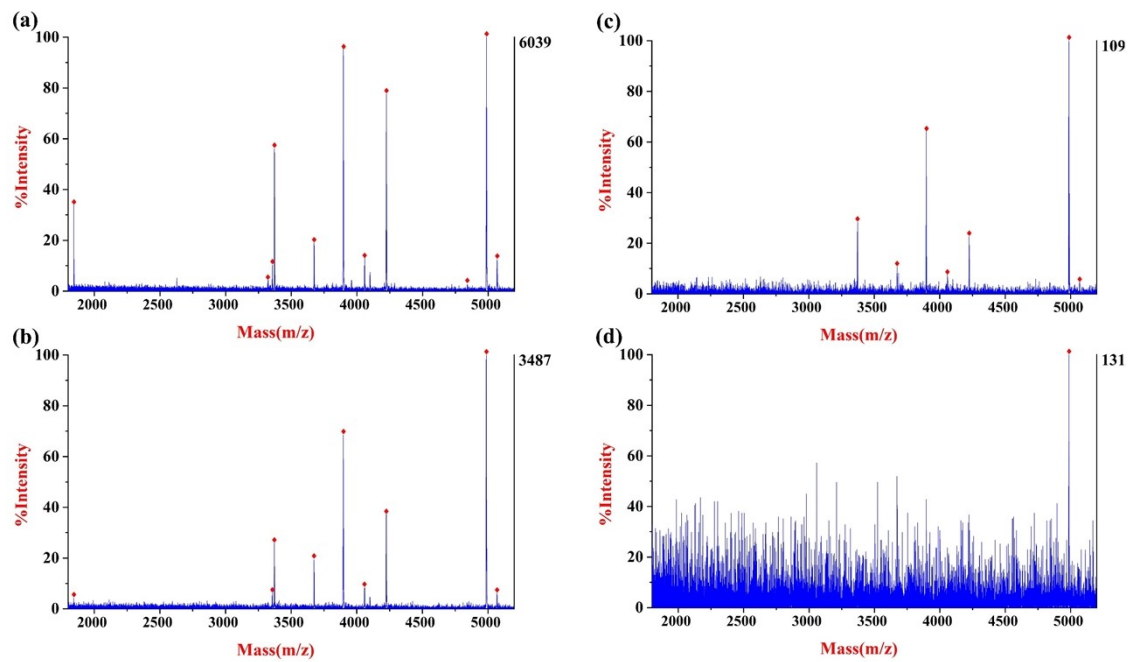

**Fig. S3.** MALDI-TOF Mass spectra of enriched glycopeptides from a mixture of HRP and BSA with a molar ratio, (a) 1:250, (b) 1:500, (c) 1:1000, (d) 1:2000, glycopeptide peaks are signed as “◆”.

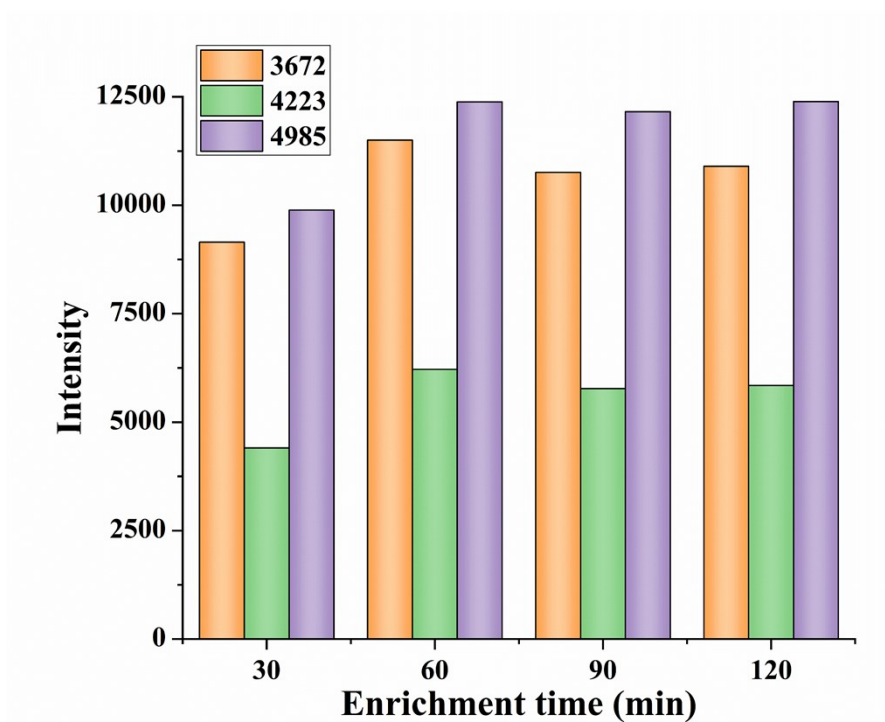

**Fig. S4.** MALDI-TOF MS spectra of HRP tryptic digest eluted with different time (30 min, 60 min, 90 min, 120 min) by M@C-Br@GMA@Glu.

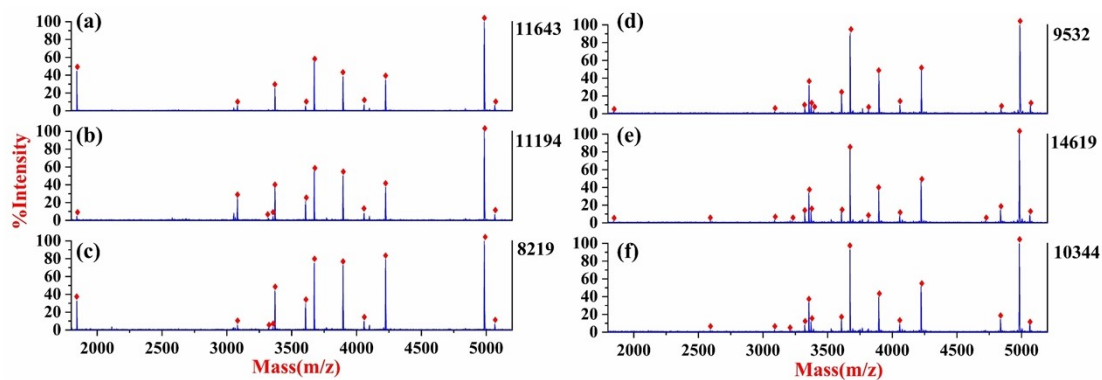

**Fig. S5.** MALDI-TOF MS spectra of HRP tryptic digest eluted with different loading buffer by M@C-Br@GMA@Glu: (a) for 0.5% TFA dissolved in 90% ACN aqueous solution, (b) for 1% TFA dissolved in 90% ACN aqueous solution, (c) for 3% TFA dissolved in 90% ACN aqueous solution, (d) for 0.5% TFA dissolved in 95% ACN aqueous solution, (e) for 1% TFA dissolved in 95% ACN aqueous solution, (f) for 3% TFA dissolved in 95% ACN aqueous solution, glycopeptides peaks are signed as “◆”.

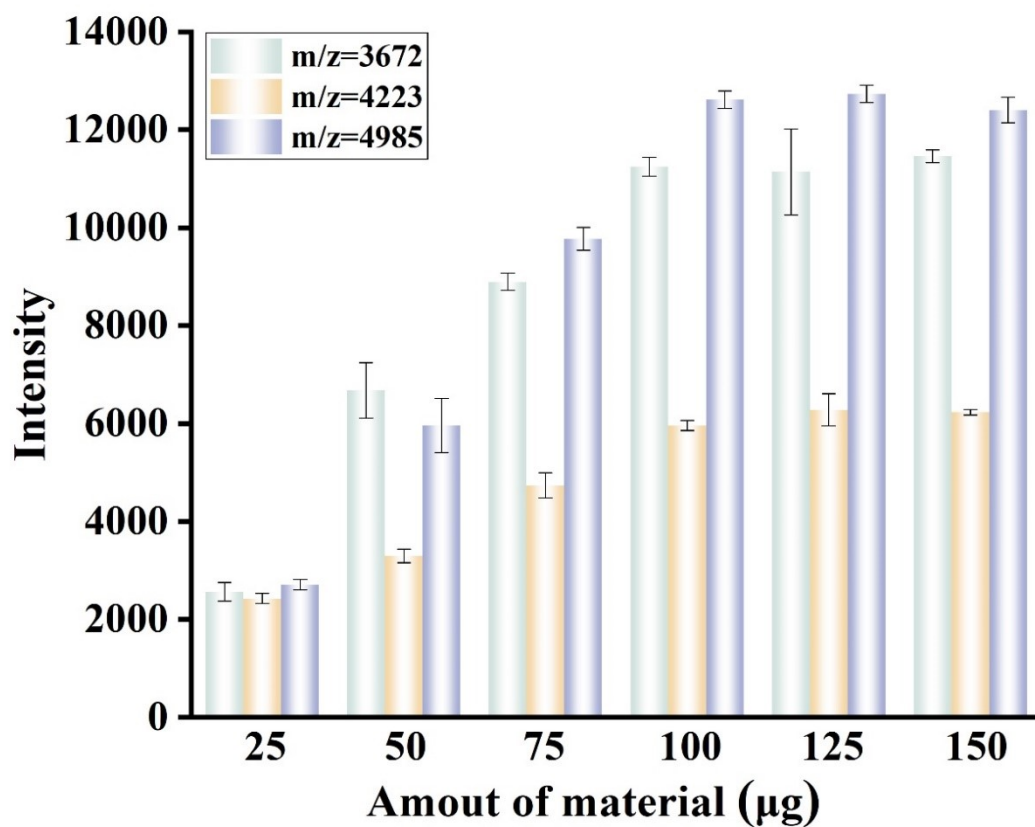

**Fig. S6.** Evaluation of the loading capacity of M@C-Br@GMA@Glu composites through enrichment for glycopeptides from HRP digests by different amounts of the composites.



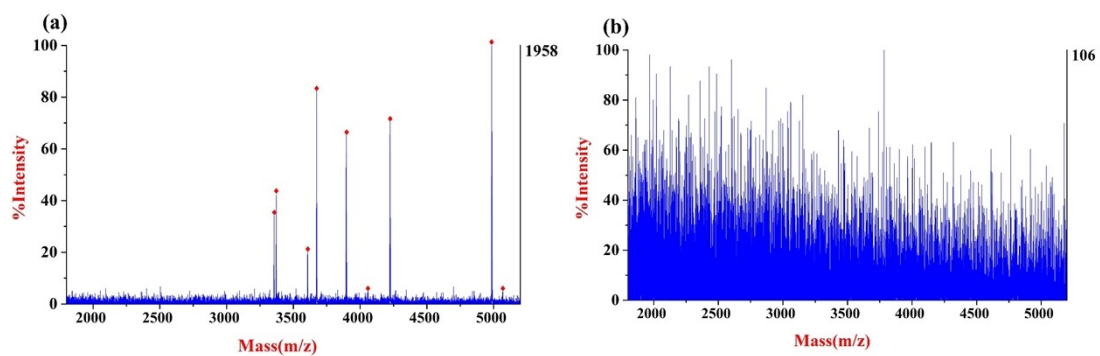

**Fig. S7.** MALDI-TOF MS spectra of the supernatant after the enriched by M@C-Br@GMA@Glu: (a) 75 µg, (b) 100 µg. Glycopeptide peaks are signed as “◆”.

**Table S1.** The detailed information of glycopeptides derived from HRP after enrichment by M@C-Br@GMA@Glu. #: Glycosylation site.

| Num. | m/z    | Amino acid sequence                 | Glycan composition                      |
|------|--------|-------------------------------------|-----------------------------------------|
| 1    | 1843.1 | NVGLN#R                             | XylMan3FucGlcNAc2                       |
| 2    | 2542.6 | SSPN#ATDTIPLVR                      | XylMan3FucGlcNAc2                       |
| 3    | 3088.9 | GLCPLNGN#LSALVDFDLR                 | XylMan3FucGlcNAc2                       |
| 4    | 3323.1 | QLTPTFYDNSCPN#VSNIVR                | XylMan3FucGlcNAc2                       |
| 5    | 3355.1 | SFAN#STQTFNFVAFVEAMDR               | XylMan3FucGlcNAc2                       |
| 6    | 3371.1 | SFAN#STQTFNFVAFVEAM*DR              | XylMan3FucuGlcNAc2                      |
| 7    | 3390.2 | DSFRNVGLN#R                         | XylMan6Fuc2GlcNAc4                      |
| 8    | 3607.4 | NQCRGLCPLNGN#LSALVDFDLR             | XylMan3FucGlcNAc2                       |
| 9    | 3674.5 | GLIQSDQELFSSPN#ATDTIPLVR            | XylMan3FucGlcNAc2                       |
| 10   | 3815.7 | LHFHDCFVNGCDASILLDN#TTSFR           | XylMan3FucGlcNAc2                       |
| 11   | 3897.6 | LHFHDCFVNGCDASILLDN#TTSFR           | XylMan3FucGlcNAc2                       |
| 12   | 4059.7 | QLTPTFYDNSC(AAVESACPR)PN#VSNIVR-H2O | XylMan3GlcNAc2                          |
| 13   | 4224.9 | QLTPTFYDNSC(AAVESACPR)PN#VSNIVR     | XylMan3FucGlcNAc2                       |
| 14   | 4722.6 | LYN#FSNTGLPDPTLN#TTYLQTLR           | Man3FucGlcNAc2,<br>Man3FucGlcNAc2       |
| 15   | 4825.8 | LYN#FSNTGLPDPTLN#TTYLQTLR           | XylMan2FucGlcNAc,<br>XylMan2GlcNAc2     |
| 16   | 4840.7 | LYN#FSNTGLPDPTLN#TTYLQTLR           | XylMan3FucGlcNAc2                       |
| 17   | 4986.9 | LYN#FSNTGLPDPTLN#TTYLQTLR           | XylMan3FucGlcNAc2,<br>XylMan3FucGlcNAc2 |

|    |        |                                 |                |
|----|--------|---------------------------------|----------------|
| 18 | 5068.9 | QLTPTFYDNSC(AAVESACPR)PN#VSNIVR | XylMan3GlcNAc2 |
|----|--------|---------------------------------|----------------|

**Table S2.** The RSD of three parallel trials on the load capacity of M@C-Br@GMA@Glu.

| Amount of material | m/z = 3672          |         | m/z = 4223          |         | m/z = 4985          |         |
|--------------------|---------------------|---------|---------------------|---------|---------------------|---------|
|                    | Average $\pm$ S. D. | RSD (%) | Average $\pm$ S. D. | RSD (%) | Average $\pm$ S. D. | RSD (%) |
| 25 $\mu$ g         | 2565.0 $\pm$ 189.6  | 7.4     | 2427.7 $\pm$ 177.9  | 7.3     | 2709.7 $\pm$ 106.3  | 3.9     |
| 50 $\mu$ g         | 6678.0 $\pm$ 567.3  | 8.5     | 3294.0 $\pm$ 139.2  | 4.2     | 5961.7 $\pm$ 556.1  | 9.3     |
| 75 $\mu$ g         | 8898.3 $\pm$ 175.9  | 1.9     | 4736.7 $\pm$ 257.7  | 5.4     | 9771.0 $\pm$ 235.0  | 2.4     |
| 100 $\mu$ g        | 11248.7 $\pm$ 195.3 | 1.7     | 5960.7 $\pm$ 101.3  | 1.7     | 12616.7 $\pm$ 181.7 | 1.4     |
| 125 $\mu$ g        | 11140.7 $\pm$ 881.1 | 7.9     | 6280.7 $\pm$ 331.1  | 5.3     | 12735.7 $\pm$ 176.8 | 1.4     |
| 150 $\mu$ g        | 11459.7 $\pm$ 127.4 | 1.1     | 6231.7 $\pm$ 54.1   | 0.9     | 12406.0 $\pm$ 258.8 | 2.1     |

**Table S3.** The comparison table of M@C-Br@GMA@Glu and other previous materials in references.

| No. | Materials used                                          | LOD                       | Selectivity          | The load capacity | Standard protein | Ref.      |
|-----|---------------------------------------------------------|---------------------------|----------------------|-------------------|------------------|-----------|
| 1   | Fe <sub>3</sub> O <sub>4</sub> @Au-GSH                  | 10 fmol μL <sup>-1</sup>  | HRP: BSA =<br>1:100  | -                 | HRP, IgG         | [1]       |
| 2   | Fe <sub>3</sub> O <sub>4</sub> @CS@Au-l-Cys             | 0.5 fmol μL <sup>-1</sup> | HRP: BSA =<br>1:1000 | -                 | HRP              | [2]       |
| 3   | magCDP@Ada-MSA                                          | 0.1 fmol μL <sup>-1</sup> | HRP: BSA=<br>1:500   | -                 | HRP              | [3]       |
| 4   | MU <sub>2</sub> O <sub>7</sub> -66-NH <sub>2</sub> /PA  | 1 fmol μL <sup>-1</sup>   | HRP: BSA =<br>1:1000 | -                 | HRP, IgG         | [4]       |
| 5   | L-Cys-Fe <sub>3</sub> O <sub>4</sub> @mSiO <sub>2</sub> | 1 fmol μL <sup>-1</sup>   | HRP: BSA =<br>1:100  | -                 | HRP, IgG         | [5]       |
| 6   | M@C-Br@GMA@Glu                                          | 0.2 fmol μL <sup>-1</sup> | HRP: BSA=<br>1:2000  | 100 mg/g          | HRP              | this work |

“-” indicates that there is no mention.

**Table S4.** Details of enriched glycopeptides derived from serum of the normal controls and CC patients by M@C-Br@GMA@Glu nanospheres.

| Num.                                                  | Annotated Sequence                       | Protein Group Accessions | Theo. MH <sup>+</sup> [Da] |
|-------------------------------------------------------|------------------------------------------|--------------------------|----------------------------|
| <b>Glycopeptides detected in normal control serum</b> |                                          |                          |                            |
| 1                                                     | [R].LSLHRPALEDLLLGSEANLTCTLTGLR.[D]      | P01876; P0DOX2           | 2964.582                   |
| 2                                                     | [K].FNLTETSEAEIHQSFQHLLR.[T]             | P01011                   | 2401.178                   |
| 3                                                     | [K].MVSHHNLTTGATLINEQWLLTTAK.[N]         | P00739; P00738           | 2680.376                   |
| 4                                                     | [K].SLGNVNFTVSAEALSEQELCGTEVPSVPEHGR.[K] | P01023                   | 3414.612                   |
| 5                                                     | [R].FSLLGHASISCTVENETIGVWRPSPPTCEK.[I]   | P04003                   | 3373.619                   |
| 6                                                     | [K].ELHHLQEQNVSNAFLDKGEFYIGSK.[Y]        | P00450                   | 2904.416                   |
| 7                                                     | [K].AALAAFNAQNGSNFQLEEISR.[A]            | P02765                   | 2366.137                   |
| 8                                                     | [K].THTNISESHPNATFSAVGEASICEDDWSNGER.[F] | P01871                   | 3520.483                   |
| 9                                                     | [K].MVSHHNLTTGATLINEQWLLTTAK.[N]         | P00739; P00738           | 2696.371                   |
| 10                                                    | [K].VGQLQLSHNLSLVLPQNLK.[H]              | P05155                   | 2314.349                   |
| 11                                                    | [R].QQQHLLFGSNVTDCSGNFCLFR.[S]           | P02787                   | 2516.108                   |
| 12                                                    | [K].VVLHPNYSQVDIGLIK.[L]                 | P00738                   | 1795.995                   |
| 13                                                    | [R].QDQCIYNTTYLNVQR.[E]                  | P02763                   | 1916.881                   |
| 14                                                    | [K].LQAPLNYTEFQKPICLPSK.[G]              | P03952                   | 2248.168                   |
| 15                                                    | [K].LDAPTNLQFVNETDSTVLVLR.[W]            | P02751                   | 2233.135                   |
| 16                                                    | [R].KVCQDCPLLAPLNDTR.[V]                 | P02765                   | 1900.926                   |
| 17                                                    | [R].VIDFNCTTSSVSSALANTK.[D]              | P04196                   | 2015.959                   |
| 18                                                    | [K].DIVEYYNDSNGSHVLQGR.[F]               | P25311                   | 2066.941                   |
| 19                                                    | [K].AALAAFNAQNGSNFQLEEISR.[A]            | P02765                   | 2367.121                   |
| 20                                                    | [R].ADGTVNQIEGEATPVNLTEPAK.[L]           | P05090                   | 2255.104                   |
| 21                                                    | [K].AVLQLNEEGVDTAGSTGVTLNLTSPILR.[F]     | P08185                   | 3111.678                   |
| 22                                                    | [K].AALAAFNAQNGSNFQLEEISR.[A]            | P02765                   | 2368.105                   |
| 23                                                    | [K].VCQDCPLLAPLNDTR.[V]                  | P02765                   | 1772.831                   |
| 24                                                    | [R].FEVDSPVYNATWSASLK.[N]                | P04114                   | 1914.912                   |
| 25                                                    | [R].FSDGLESNSSTQFEVK.[K]                 | P0C0L4; P0C0L5           | 1775.797                   |
| 26                                                    | [K].AVLQLNEEGVDTAGSTGVTLNLTSPILR.[F]     | P08185                   | 3110.694                   |
| 27                                                    | [K].MVSHHNLTTGATLINEQWLLTTAK.[N]         | P00739; P00738           | 2681.360                   |
| 28                                                    | [R].DESFAELHSKFLNEDYKSVFMKNISFDK.[I]     | P21105                   | 3545.624                   |
| 29                                                    | [R].ADGTVNQIEGEATPVNLTEPAKLEVK.[F]       | P05090                   | 2724.394                   |
| 30                                                    | [R].QNQCFYNSSYLNVQR.[E]                  | P19652                   | 1921.850                   |
| 31                                                    | [K].ENLTAPGSDSAVFFEQGTTR.[I]             | P00450                   | 2127.983                   |
| 32                                                    | [R].QNQCFYNSSYLNVQR.[E]                  | P19652                   | 1922.834                   |
| 33                                                    | [R].KLPPGLLANFTLLR.[T]                   | P02750                   | 1553.941                   |
| 34                                                    | [R].LAGKPTHVNVSVVMAEVDGTCY.[-]           | P01876                   | 2348.126                   |
| 35                                                    | [K].EHEGAIYPDNTTDFQR.[A]                 | P00450                   | 1893.825                   |
| 36                                                    | [R].LANLTQGEDQYYLR.[V]                   | P10909                   | 1684.818                   |
| 37                                                    | [R].VNQNLVYESGSLNFSK.[L]                 | P04114                   | 1799.881                   |
| 38                                                    | [R].VLSNNSDANLELINTWVAK.[N]              | P05155                   | 2102.076                   |

|    |                                           |                |          |
|----|-------------------------------------------|----------------|----------|
| 39 | [R].GLNVTLSSSTGRNGFK.[S]                  | P0C0L4; P0C0L5 | 1552.797 |
| 40 | [K].WFYIASAFRNEEYNK.[S]                   | P02763; P19652 | 1938.902 |
| 41 | [K].EGYSNISYIVVNHQGISSR.[L]               | P49908         | 2124.036 |
| 42 | [R].DQCIVDDITYNVNDTFHK.[R]                | Q28749; P02751 | 2197.971 |
| 43 | [R].FNSSYLQGTNQITGR.[Y]                   | P04114         | 1686.808 |
| 44 | [K].SLGNVNFTVSAEAELESQELCGTEVPSVPEHGR.[K] | P01023         | 3415.596 |
| 45 | [K].GCVLLSYLNETVTVSASLESVR.[G]            | P01023         | 2398.217 |
| 46 | [R].VYKPSAGNNSLYR.[D]                     | P02749         | 1469.738 |
| 47 | [R].GFGVAIVGNYTAALPTEAALR.[T]             | Q96PD5         | 2092.107 |
| 48 | [K].NLFLNHSENATAK.[D]                     | P00739; P00738 | 1460.702 |
| 49 | [R].FSYSKNETYQLFLSYSSK.[K]                | P02748         | 2193.039 |
| 50 | [K].LNAENNATFYFK.[I]                      | P01042         | 1432.674 |
| 51 | [K].AGLQAFFVQVECNK.[S]                    | P00450         | 1640.774 |
| 52 | [R].IYSGILNLSDITK.[D]                     | P03952         | 1437.784 |
| 53 | [K].LATALSLSNKFVEGSHNSTVSLTTK.[N]         | P04114         | 2607.351 |
| 54 | [K].VTQVYAENGTVLQGSTVASVYK.[G]            | P27169         | 2315.177 |
| 55 | [K].YTGNASALFILPDQDK.[M]                  | P01011         | 1753.864 |
| 56 | [K].ALGISPFHEHAEVVFTANDSGPR.[R]           | P02766         | 2452.189 |
| 57 | [K].YNSQNQSNNQFVLYR.[I]                   | P01042         | 1875.862 |
| 58 | [K].WFYIASAFRNEEYNK.[S]                   | P02763; P19652 | 1939.886 |
| 59 | [K].NLFLNHSENATAK.[D]                     | P00739; P00738 | 1461.686 |
| 60 | [R].AQLLQGLGFNLTER.[S]                    | P08185         | 1560.838 |
| 61 | [K].NTTCQDLQIEVTVK.[G]                    | P0C0L4; P0C0L5 | 1649.805 |
| 62 | [K].DIVEYYNDSNGSHVLQGR.[F]                | P25311         | 2067.925 |
| 63 | [K].TPLTANITK.[S]                         | P0DOX2         | 959.541  |
| 64 | [R].SQILEGLGFNLTESESDVHR.[G]              | Q5RRCR2        | 2345.162 |
| 65 | [R].LSHNELADSGIPGNSFNSSLVELDLSYNK.[L]     | P51884         | 3221.548 |
| 66 | [K].ELHHLQEQNVSNAFLDK.[G]                 | P00450         | 2022.988 |
| 67 | [R].SPYYNVSDEISFHCYDGYTLR.[G]             | Q864V9         | 2587.108 |
| 68 | [K].ALPQPQNVTSLLGCTH.[-]                  | P02790         | 1736.864 |
| 69 | [K].LNAENNATFYFK.[I]                      | P01042         | 1433.658 |
| 70 | [K].HANWTLTPLK.[S]                        | P27169         | 1181.631 |
| 71 | [K].LATALSLSNKFVEGSHNSTVSLTTK.[N]         | P04114         | 2606.367 |
| 72 | [K].LPTQNITFQTESSVAEQEAEFQSPK.[Y]         | Q14624         | 2810.337 |
| 73 | [K].LYLGSNLTLALHPALFQNLK.[L]              | P22792         | 2316.223 |
| 74 | [K].LDAPTNLQFVNEDSTVLVVR.[W]              | P02751         | 2234.119 |
| 75 | [R].GLNVTLSSSTGR.[N]                      | P0C0L4; P0C0L5 | 1105.585 |
| 76 | [R].ITYSIVQTNCSK.[E]                      | P01042         | 1414.688 |
| 77 | [K].CGLVPVLAENYNK.[SN]                    | P02787         | 1477.736 |
| 78 | [K].GAFISNFSMTVDGK.[T]                    | P19823         | 1474.688 |
| 79 | [R].SWPAVGNCSALR.[W]                      | P02790         | 1405.653 |
| 80 | [R].EEQYNSTYR.[V]                         | P0DOX5         | 1190.496 |
| 81 | [R].EEQFNSTFR.[V]                         | P01859         | 1158.506 |

|     |                                            |                |          |
|-----|--------------------------------------------|----------------|----------|
| 82  | [R].ENISDPTSPLR.[T]                        | P01591         | 1229.601 |
| 83  | [R].QQQHFLFGSNVTDCSGNFCLFR.[S]             | P02787         | 2517.092 |
| 84  | [K].YDFNSSMLYSTAK.[G]                      | P04114         | 1527.667 |
| 85  | [K].IYPGVDFGGEELNVTFVK.[G]                 | P03952         | 1984.990 |
| 86  | [R].GLCVNASAVSR.[L]                        | P17936         | 1134.557 |
| 87  | [R].ALGFENATQALGR.[A]                      | Q08380         | 1348.686 |
| 88  | [R].EEQFNSTYR.[V]                          | P01861         | 1174.501 |
| 89  | [K].TVLTPATNHMGNVFTTIPANR.[E]              | P01024         | 2256.144 |
| 90  | [K].VGQLQLSHNLSLVILVPQNLK.[H]              | P05155         | 2315.333 |
| 91  | [K].IDSTGNVTNELR.[V]                       | O75882         | 1319.644 |
| 92  | [K].YNSQNQSNNQFVLYR.[I]                    | P01042         | 1876.846 |
| 93  | [K].FEAAVNKAYNK.[S]                        | Q180E9         | 1255.632 |
| 94  | [R].VLSNNSDANLELINTWVAK.[N]                | P05155         | 2104.044 |
| 95  | [R].DIENFNSTQK.[F]                         | P43652         | 1196.543 |
| 96  | [R].SPYYNVSDEISFHCYDGYTLR.[G]              | P00751         | 2587.108 |
| 97  | [K].ADTHDEILEGLNFNLTEIPEAQIHEGFQELLR.[T]   | P01009         | 3692.808 |
| 98  | [K].NNATVHEQVGGPSLTSDLQAQSK.[G]            | P04004         | 2382.153 |
| 99  | [R].ESVTDHVNLTIPLEKPLQNFTLCFR.[A]          | P02743         | 2972.519 |
| 100 | [K].VSNQTLSLFFTVLQDVPVR.[D]                | P01023         | 2164.165 |
| 101 | [K].ELHHLQEQNVSN AFLDKGEFYIGSK.[Y]         | P00450         | 2905.400 |
| 102 | [K].LGSFEGLVNLTFIHLQHNR.[L]                | P51884         | 2196.156 |
| 103 | [K].NNATVHEQVGGPSLTSDLQAQSK.[G]            | P04004         | 2383.137 |
| 104 | [R].QQQHFLFGSNVTDCSGNFCLFR.[S]             | P02787         | 2516.108 |
| 105 | [K].LGACNDTLQQLMEVFKFDTISEK.[T]            | P01008         | 2688.290 |
| 106 | [R].DQCIVDDITYNVNDTFHK.[R]                 | Q28749; P02751 | 2198.955 |
| 107 | [K].THTNISESHPNATFSAVGEASICEDDDWSGER.[F]   | P0DOX6         | 3521.467 |
| 108 | [K].ADTHDEILEGLNFNLTEIPEAQIHEGFQELLR.[T]   | P01009         | 3693.792 |
| 109 | [K].AFENVTDLQWLILDHNLLENSK.[I]             | P51884         | 2613.320 |
| 110 | [R].GGSSGWSGGLAQNR.[S]                     | P07357         | 1334.608 |
| 111 | [R].SRYPHKPEINSTTHPGADLQENFCR.[N]          | P00734         | 2955.380 |
| 112 | [R].EEQYNSTYRVVSVLTVLHQDWLNGK.[E]          | P0DOX5         | 2980.469 |
| 113 | [R].LEPVHLQLQCMSQEQLAQAANATK.[E]           | Q96PD5         | 2808.402 |
| 114 | [K].NCGVNCSDVFTALIGEIASPNYPKYPENS.[C]      | P09871         | 3527.621 |
| 115 | [K].QVFPGLNYCTSGAYSNASSTDSASYYPPLTGDTR.[L] | P04114         | 3552.538 |
| 116 | [K].DTLTSRPAQGVVTTLENVSPPR.[R]             | P02751         | 2339.220 |
| 117 | [K].LYLGSNNLTALHPALFQNLK.[L]               | P22792         | 2317.207 |
| 118 | [R].YPHKPEINSTTHPGADLQENFCR.[N]            | P00734         | 2712.247 |
| 119 | [K].YLGNATAIFFLPDEGK.[L]                   | P01009         | 1756.879 |
| 120 | [K].DIVEYYNDSNGSHVLQGR.[F]                 | P25311         | 2066.941 |
| 121 | [K].SRPANHCVYFYGDEISFSCHETSR.[F]           | P04003         | 2920.241 |
| 122 | [K].QVFPGLNYCTSGAYSNASSTDSASYYPPLTGDTR.[L] | P04114         | 3551.554 |



|     |                                                              |                |          |
|-----|--------------------------------------------------------------|----------------|----------|
| 123 | [K].QEPERNECFLQHK.[D]                                        | P02768; P02770 | 1715.781 |
| 124 | [R].VYKPSAGNNSLYR.[D]                                        | P02749         | 1470.722 |
| 125 | [K].SLGPNSCSANGPLYLIHGPNLYCYSDVEK.[L]                        | P02790         | 3283.503 |
| 126 | [K].LNAENNATFYFK.[I]                                         | P01042         | 1432.674 |
| 127 | [K].SPDVINGSPISQK.[I]                                        | P08603         | 1342.685 |
| 128 | [K].GVTSVSQIFHSPDLAIRDTFVNASR.[T]                            | P05155         | 2718.385 |
| 129 | [K].MLNTSSLLEQLNEQFNWVSR.[L]                                 | P10909         | 2426.166 |
| 130 | [K].MVSHHNLTTGATLINEQWLLTTAK.[N]                             | P00739; P00738 | 2697.355 |
| 131 | [K].AALAAFNAQNGSNFQLEEISR.[A]                                | P02765         | 2368.105 |
| 132 | [K].YKNNSDISSTR.[G]                                          | P01871         | 1286.586 |
| 133 | [K].YKNNSDISSTR.[G]                                          | P01871         | 1285.602 |
| 134 | [R].NHSCEPCQTLAVR.[S]                                        | P00748         | 1572.689 |
| 135 | [K].AKVGQLQLSHNLSLVILVPQNLK.[H]                              | P05155         | 2513.481 |
| 136 | [R].YAEDKFNETTEK.[S]                                         | P43652         | 1475.654 |
| 137 | [K].ISNSSDTVECECSENWK.[G]                                    | O75882         | 2045.806 |
| 138 | [K].SLTFNETYQDISELVYGAK.[L]                                  | P01008         | 2179.044 |
| 139 | [R].AVNITSENLIDDVVSLIR.[G]                                   | P02748         | 1972.060 |
| 140 | [K].HQDFNSAVQLVENFCR.[N]                                     | P00734         | 1964.892 |
| 141 | [K].QSVPAHFVALNGSK.[L]                                       | Q863A0         | 1455.759 |
| 142 | [K].NLSMPLLPADFHK.[E]                                        | P05546         | 1483.761 |
| 143 | [R].NCCNTENPPGCYR.[Y]                                        | P43652         | 1642.604 |
| 144 | [K].VSNVSCQASVSR.[M]                                         | P55058         | 1294.606 |
| 145 | [K].HYTNSSQDVTVPCR.[V]                                       | P0DOX2         | 1664.733 |
| 146 | [K].RNNQTIFEQTINDLTFDGSFIK.[E]                               | A1YG99         | 2603.262 |
| 147 | [K].TKPREEQYNSTYR.[V]                                        | P0DOX5         | 1672.793 |
| 148 | [R].NLTTSLTESVDR.[N]                                         | P80108         | 1336.659 |
| 149 | [R].FNDTEVLQR.[L]                                            | P43251         | 1122.543 |
| 150 | [R].LQNNENNISCVER.[G]                                        | P36980; Q03591 | 1591.702 |
| 151 | [R].FGCEIENNR.[S]                                            | P25311         | 1139.479 |
| 152 | [K].FLNNGTCTAEGK.[F]                                         | P05156         | 1312.584 |
| 153 | [R].ISEENETTCYMGK.[W]                                        | P08603         | 1562.635 |
| 154 | [R].EEQYNSTFR.[V]                                            | P01860         | 1174.501 |
| 155 | [K].LGNWSAMPSCCK.[A]                                         | P02749         | 1251.550 |
| 156 | [K].EDALNETR.[E]                                             | P10909         | 948.427  |
| 157 | [R].WFSAGLASNSSWLR.[E]                                       | Q8WNM0         | 1582.765 |
| 158 | [R].LQNNENNISCVER.[G]                                        | P36980; Q03591 | 1590.718 |
| 159 | [K].WSDIWNATK.[Y]                                            | P06276         | 1121.526 |
| 160 | [R].DTFVNASR.[T]                                             | P05155         | 910.426  |
| 161 | [K].LGNWSAMPSCCK.[A]                                         | P02749         | 1267.545 |
| 162 | [K].FVEGSHNSTVSLTTK.[N]                                      | P04114         | 1607.791 |
| 163 | [K].FSPSLGILKNGSTALHAAVMGGSLKAVDLLLKA<br>NADPALPNTNNELPR.[D] | Q502M6         | 4914.603 |
| 164 | [K].VDKDLQSLEDILHQVENK.[T]                                   | P02679         | 2124.082 |

|     |                                                       |                |          |
|-----|-------------------------------------------------------|----------------|----------|
| 165 | [K].YLGNATAIFFLPDEGKLQHLENELTHDIITK.[F]               | P01009         | 3541.821 |
| 166 | [K].ADTHDEILEGLNFNLTEIPEAQIHEGFQELLR.[T]              | P01009         | 3692.808 |
| 167 | [K].GLKFNLTTETSEAEIHQSFQHLLR.[T]                      | P01011         | 2699.379 |
| 168 | [K].SVQEIQATFFYFTPNKTEDTIFLR.[E]                      | P02763; P19652 | 2896.440 |
| 169 | [R].EGDHEFLEVPEAQEDVEATFPVHQPGNYSCSYR.[T]             | P04217         | 3837.661 |
| 170 | [K].WNPSPPACEPNSCINLPDIPHASWETYPRPTK.[E]              | P04003         | 3733.705 |
| 171 | [K].WNPSPPACEPNSCINLPDIPHASWETYPRPTK.[E]              | P04003         | 3732.721 |
| 172 | [K].DFVNASSKYEITTIHNLFR.[K]                           | P05546         | 2256.130 |
| 173 | [R].NEEYNKSVQEIQATFFYFTPNKTEDTIFLR.[E]                | P02763; P19652 | 3674.754 |
| 174 | [K].NNATVHEQVGGPSLTSDLQAQSK.[G]                       | P04004         | 2382.153 |
| 175 | [K].SLGNVNFTVSAEAELESQELCGTEVPSVPEHGRK.[D]            | P01023         | 3542.707 |
| 176 | [K].KLSSWVLLMKYLGNATAIFFLPDEGKLQHLENE<br>LTHDIITK.[F] | P01009         | 4727.516 |
| 177 | [R].QLAHQSNSTNIFFSPVSIATAFAMLSLGTK.[A]                | P01009         | 3183.603 |
| 178 | [K].DLQSLEDILHQVENKTSEVK.[Q]                          | P02679         | 2326.177 |
| 179 | [K].DLQSLEDILHQVENK.[T]                               | P02679         | 1781.892 |
| 180 | [K].AGLQAFFVQECNKSSSK.[D]                             | P00450         | 2029.965 |
| 181 | [R].QLAHQSNSTNIFFSPVSIATAFAMLSLGTK.[A]                | P01009         | 3182.619 |
| 182 | [K].AALAAFNAQNGSNFQLEEISR.[A]                         | P02765         | 2368.105 |
| 183 | [K].SLGPNSCSANGPLYLIHGPNLYCYSYDVEK.[L]                | P02790         | 3284.487 |
| 184 | [K].YLGNATAIFFLPDEGKLQHLENELTHDIITK.[F]               | P01009         | 3542.805 |
| 185 | [R].WVLTAAHCLLYPPWDKNFTENDLLVR.[I]                    | P00734         | 3172.592 |
| 186 | [R].QKDVDKEFYLFPTVFDENESLLEDNIR.[M]                   | P00450         | 3417.674 |
| 187 | [R].LQAILGVPWKDKNCTSR.[L]                             | Q9GLN8         | 1987.043 |
| 188 | [K].NCGVNCSDVFTALIGEIASPNYPKYPENSR.[C]                | P09871         | 3528.605 |
| 189 | [K].LNAENNATFYFK.[I]                                  | P01042         | 1433.658 |
| 190 | [R].WVLTAAHCLLYPPWDKNFTENDLLVR.[I]                    | P00734         | 3173.576 |
| 191 | [R].FNSSYLQGTNQITGR.[Y]                               | P04114         | 1687.792 |
| 192 | [R].NETGPYQCEIR.[D]                                   | P11464         | 1367.590 |
| 193 | [K].VTACHSSQP NATLYK.[M]                              | P05543         | 1677.790 |
| 194 | [R].ETAYSNASLLIQNVTR.[E]                              | P11464         | 1781.892 |
| 195 | [R].VLYLAAYNCTLRPVSK.[K]                              | Q9UGM5         | 1868.994 |
| 196 | [R].LQNNENNISCVER.[G]                                 | P36980; Q03591 | 1591.702 |
| 197 | [R].KLPDHHSPALFQDCMNASIHFLK.[A]                       | Q5VUY2         | 2707.312 |
| 198 | [R].FSDGLESNSSTQFEVK.[K]                              | P0C0L5         | 1775.797 |
| 199 | [R].DNCCILDER.[F]                                     | P02679         | 1195.472 |
| 200 | [K].FLNNGTCTAEGK.[F]                                  | P05156         | 1313.568 |
| 201 | [K].VPGNVTAVLGETLK.[V]                                | P01833         | 1398.784 |
| 202 | [K].NGSLFAFR.[G]                                      | P04004         | 912.457  |
| 203 | [R].FSGSTSGNTTTLTISR.[V]                              | A0A075B6J6     | 1630.792 |
| 204 | [R].GLNVTLSSSTGR.[N]                                  | P0C0L5         | 1105.585 |

|                                           |                                            |                |          |
|-------------------------------------------|--------------------------------------------|----------------|----------|
| 205                                       | [K].NNSDISSTR.[G]                          | P01871         | 994.444  |
| 206                                       | [K].DVLNFTCEPK.[S]                         | P11464         | 1223.561 |
| 207                                       | [K].NLFLNHSENATAK.[D]                      | P00739; P00738 | 1459.718 |
| 208                                       | [K].NGTAVCATNR.[R]                         | P05156         | 1064.479 |
| 209                                       | [K].YNSQNSNNQFVLYR.[I]                     | P01042         | 1876.846 |
| 210                                       | [R].LDVDQALNR.[S]                          | P04278         | 1044.532 |
| <b>Glycopeptides detected in CC serum</b> |                                            |                |          |
| 1                                         | [K].THTNISESHPNATFSAVGEASICEDDWNSEGER.[F]  | P01871         | 3520.483 |
| 2                                         | [R].LSLHRPALEDLLLGSEANLTCTLTGLR.[D]        | P01876; P0DOX2 | 2964.582 |
| 3                                         | [K].LGACNDTLQQLMEVFKFDTISEK.[T]            | P01008         | 2688.290 |
| 4                                         | [K].AALAAFNAQNNGSNFQLEEISR.[A]             | P02765         | 2366.137 |
| 5                                         | [K].YLGNATAIFFLPDEGKLQHLENELTHDIITK.[F]    | P01009         | 3541.821 |
| 6                                         | [R].DQCIVDDITYNVNDTFHK.[R]                 | Q28749; P02751 | 2197.971 |
| 7                                         | [K].SLGNVNFTVSAEALLESQELCGTEVPSVPEHGR.[K]  | P01023         | 3414.612 |
| 8                                         | [K].ADTHDEILEGLNFNLTEIPEAQIHEGFQELLR.[T]   | P01009         | 3692.808 |
| 9                                         | [R].QQQHFLFGSNVTDCSGNFCLFR.[S]             | P02787         | 2516.108 |
| 10                                        | [K].AALAAFNAQNNGSNFQLEEISR.[A]             | P02765         | 2367.121 |
| 11                                        | [K].LDAPTNLQFVNEDSTVLVLR.[W]               | P02751         | 2233.135 |
| 12                                        | [R].FSLLGHASISCTVENETIGVWRPSPPTCEK.[I]     | P04003         | 3373.619 |
| 13                                        | [K].VVLHPNYSQVDIGLIK.[L]                   | P00738         | 1795.995 |
| 14                                        | [K].LGSFEGLVNLTFIHLQHNR.[L]                | P51884         | 2196.156 |
| 15                                        | [K].SVQEIQATFFYFTPNTEDTIFLR.[E]            | P02763; P19652 | 2896.440 |
| 16                                        | [K].THTNISESHPNATFSAVGEASICEDDDWSEGER.[F]  | P0DOX6         | 3521.467 |
| 17                                        | [K].ADTHDEILEGLNFNLTEIPEAQIHEGFQELLR.[T]   | P01009         | 3693.792 |
| 18                                        | [R].ESVTDHVNLTIPLEKPLQNFTLCFR.[A]          | P02743         | 2972.519 |
| 19                                        | [R].FSDGLESNSSTQFEVK.[K]                   | P0C0L4; P0C0L5 | 1775.797 |
| 20                                        | [K].VSNQTLNLFVTLQDVPVR.[D]                 | P01023         | 2164.165 |
| 21                                        | [R].SPYYNVSDEISFHCYDGYTLR.[G]              | P00751         | 2587.108 |
| 22                                        | [K].LPTQNITFQTESSVAEQEAEFQSPK.[Y]          | Q14624         | 2810.337 |
| 23                                        | [K].SLGNVNFTVSAEALLESQELCGTEVPSVPEHGR.[K]  | P01023         | 3415.596 |
| 24                                        | [K].IITILEEEMNVSVCGLYTYGKVPVPGHVTVSICR.[K] | P01023         | 3735.879 |
| 25                                        | [R].FNSSYLQGTNQITGR.[Y]                    | P04114         | 1686.808 |
| 26                                        | [R].KVCQDCPLLAPLNDTR.[V]                   | P02765         | 1900.926 |
| 27                                        | [R].SQILEGLGFNLTESESDVHR.[G]               | Q5RCR2         | 2345.162 |
| 28                                        | [K].AGLQAFFVQECNK.[S]                      | P00450         | 1640.774 |
| 29                                        | [K].VCQDCPLLAPLNDTR.[V]                    | P02765         | 1772.831 |
| 30                                        | [K].FNLTETSEAEIHQSFQHLLR.[T]               | P01011         | 2401.178 |
| 31                                        | [K].NLFLNHSENATAK.[D]                      | P00738         | 1460.702 |
| 32                                        | [R].TEVSSNHVLIYLDKVSNTLSLFFTVLQDVPVR.[D]   | P01023         | 3762.995 |
| 33                                        | [R].QNQCIFYNSSYLVNQR.[E]                   | P19652         | 1921.850 |
| 34                                        | [K].YLGNATAIFFLPDEGK.[L]                   | P01009         | 1756.879 |
| 35                                        | [K].NLFLNHSENATAK.[D]                      | P00738         | 1461.686 |

|    |                                                           |                |          |
|----|-----------------------------------------------------------|----------------|----------|
| 36 | [K].YLGNATAIFFLPDEGKLQHLENELTHDIITK.[F]                   | P01009         | 3542.805 |
| 37 | [R].FEVDSPVYNATWSASLK.[N]                                 | P04114         | 1914.912 |
| 38 | [K].EHEGAIYPDNTTDFQR.[A]                                  | P00450         | 1893.825 |
| 39 | [R].IYSGILNLSDITK.[D]                                     | P03952         | 1437.784 |
| 40 | [R].LANLTQGEDQYYLR.[V]                                    | P10909         | 1684.818 |
| 41 | [K].VGQLQLSHNLSLVILVPQNLK.[H]                             | P05155         | 2314.349 |
| 42 | [K].YKNNSDISSTR.[G]                                       | P01871         | 1286.586 |
| 43 | [R].QDQCIYNTTYLNVQR.[E]                                   | P02763         | 1916.881 |
| 44 | [R].ADGTVNQIEGEATPVNLTEPAKLEVK.[F]                        | P05090         | 2724.394 |
| 45 | [R].ADGTVNQIEGEATPVNLTEPAK.[L]                            | P05090         | 2255.104 |
| 46 | [K].LNAENNATFYFK.[I]                                      | P01042         | 1432.674 |
| 47 | [K].LQAPLNYTEFQKPICLPSK.[G]                               | P03952         | 2248.168 |
| 48 | [K].KLSSWVLLMKYLGNATAIFFLPDEGKLQHLENE<br>LTHDIITK.[F]     | P01009         | 4727.516 |
| 49 | [R].VYKPSAGNNSLYR.[D]                                     | P02749         | 1470.722 |
| 50 | [R].ENISDPTSPLR.[T]                                       | P01591         | 1229.601 |
| 51 | [K].MVSHHNLTTGATLINEQWLLTTAK.[N]                          | P00738         | 2680.376 |
| 52 | [K].MVSHHNLTTGATLINEQWLLTTAK.[N]                          | P00738         | 2696.371 |
| 53 | [K].LNAENNATFYFK.[I]                                      | P01042         | 1433.658 |
| 54 | [K].HANWTLTPLK.[S]                                        | P27169         | 1181.631 |
| 55 | [K].AALAAFNAQNGSNFQLEEISR.[A]                             | P02765         | 2368.105 |
| 56 | [K].DFVNASSKYEITTIHNLFR.[K]                               | P05546         | 2256.130 |
| 57 | [R].GLNVTLSSTGR.[N]                                       | P0C0L4; P0C0L5 | 1105.585 |
| 58 | [R].IVGGTNSSWGEWPWQVSLQVK.[L]                             | P03952         | 2359.172 |
| 59 | [K].NNSDISSTR.[G]                                         | P01871         | 994.444  |
| 60 | [K].CGLVPVLAENYNK.[SN]                                    | P02787         | 1477.736 |
| 61 | [R].KLPPGLLANFTLLR.[T]                                    | P02750         | 1553.941 |
| 62 | [R].FNSSYLQGTNQITGR.[Y]                                   | P04114         | 1687.792 |
| 63 | [R].GGSSGWSGGLAQNR.[S]                                    | P07357         | 1334.608 |
| 64 | [R].AQLLQGLGFNLTER.[S]                                    | P08185         | 1560.838 |
| 65 | [R].SWPAVGNCSALR.[W]                                      | P02790         | 1405.653 |
| 66 | [K].YKNNSDISSTR.[G]                                       | P01871         | 1285.602 |
| 67 | [K].AFENVTDLQWLILDHNLENSK.[I]                             | P51884         | 2613.320 |
| 68 | [K].GAFISNFSMTVDGK.[T]                                    | P19823         | 1474.688 |
| 69 | [R].QLAHQSNSTNIFFSPVSIATAFAMLSLGTK.[A]                    | P01009         | 3182.619 |
| 70 | [R].DMLDRFLGVDITSIGGNPTDSRIDGEKGALTSVG<br>NHPNSTLAEQR.[E] | C4JTD3         | 4755.328 |
| 71 | [K].EGYSNISYIVVNHQGISSR.[L]                               | P49908         | 2124.036 |
| 72 | [K].VSDDITYVATATLPNYCRAGNGPK.[D]                          | P79085         | 2641.256 |
| 73 | [R].RSDLPGGLAGPRGGLNTR.[S]                                | Q02080         | 1881.989 |
| 74 | [R].ALGFENATQALGR.[A]                                     | Q08380         | 1348.686 |
| 75 | [K].AIDLNLENFHIIIIGDAINLSTYFK.[N]                         | Q9F411         | 2737.397 |
| 76 | [K].FLNNGTCTAEGK.[F]                                      | P05156         | 1312.584 |

|     |                                          |                |          |
|-----|------------------------------------------|----------------|----------|
| 77  | [R].QQQHFLFGSNVTDCSGNFCLFR.[S]           | P02787         | 2517.092 |
| 78  | [K].QVFPGLNYCTSGAYSNASSTDSASYPLTGDTR.[L] | P04114         | 3551.554 |
| 79  | [K].QVLFLDTVYGNCSHFVTK.[T]               | P04114         | 2230.085 |
| 80  | [R].EEQFNSTFR.[V]                        | P01859         | 1158.506 |
| 81  | [K].VHNGSEILFSYFQDLVITLPFELR.[K]         | P04114         | 2838.471 |
| 82  | [R].ITYSIVQTNCSK.[E]                     | P01042         | 1414.688 |
| 83  | [K].IGGIWTVWGTNK.[S]                     | P14151         | 1332.695 |
| 84  | [R].RGSNLASGRRTPPNCAAEDIK.[A]            | Q9ULD9         | 2271.126 |
| 85  | [K].LYLGSNNLTALHPALFQNLK.[L]             | P22792         | 2316.223 |
| 86  | [K].CGLVPVLAENYK.[SN]                    | P02787         | 1478.720 |
| 87  | [R].NISDGFDPDNVDAALALPAHSYSGR.[E]        | P04004         | 2773.306 |
| 88  | [K].ALPQPQNVTSLLGCTH.[-]                 | P02790         | 1736.864 |
| 89  | [K].ELHHLQEQNVSNAFLDKGEFYIGSK.[Y]        | P00450         | 2905.400 |
| 90  | [R].WFSAGLASNSSWLR.[E]                   | Q8WNM0         | 1582.765 |
| 91  | [R].SGNYPSSLSNETDR.[L]                   | Q9NS86         | 1527.656 |
| 92  | [K].AAIPSALDTNSSK.[S]                    | Q08380         | 1275.643 |
| 93  | [K].YNSQNSNNQFVLYR.[I]                   | P01042         | 1876.846 |
| 94  | [R].DTFVNASR.[T]                         | P05155         | 910.426  |
| 95  | [R].VELEDFNGNR.[T]                       | O75636         | 1194.527 |
| 96  | [R].DIENFNSTQK.[F]                       | P43652         | 1196.543 |
| 97  | [K].WVSNKTEGR.[I]                        | P01008         | 1077.532 |
| 98  | [R].EEQYNSTYR.[V]                        | P01857         | 1190.496 |
| 99  | [K].LPPGLLANFTLLR.[T]                    | P02750         | 1425.846 |
| 100 | [R].VITVQVANFTLR.[L]                     | Q9Y6R7         | 1361.779 |
| 101 | [K].WSDIWNATK.[Y]                        | P06276         | 1121.526 |
| 102 | [K].NGTAVCATNR.[R]                       | P05156         | 1064.479 |
| 103 | [R].NGTLVAFR.[G]                         | Q92954         | 878.473  |
| 104 | [R].AFGSNPNLTK.[V]                       | P22792         | 1049.526 |
| 105 | [K].EDALNETR.[E]                         | P10909         | 948.427  |
| 106 | [R].EEQYNSTFR.[V]                        | P01860         | 1174.501 |
| 107 | [K].IDSTGNVTNELR.[V]                     | O75882         | 1319.644 |
| 108 | [R].NECFLOHK.[D]                         | P02768; P02770 | 1076.483 |
| 109 | [K].ELLETVVNR.[T]                        | P55056         | 1073.584 |
| 110 | [R].FNDTEVLQR.[L]                        | P43251         | 1122.543 |
| 111 | [K].DFYVDENTTVR.[V]                      | Q5RCR2         | 1359.606 |
| 112 | [R].LDVDQALNR.[S]                        | P04278         | 1044.532 |
| 113 | [K].YSRKNMLYMNSSEK.[D]                   | Q8IM30         | 1768.788 |
| 114 | [R].FSGSTSGNTTTLTISR.[V]                 | A0A075B6J6     | 1630.792 |
| 115 | [R].QQQHFLFGSNVTDCSGNFCLFR.[S]           | P02787         | 2516.108 |
| 116 | [K].MVSHHNLTTGATLINEQWLLTTAK.[N]         | P00739; P00738 | 2680.376 |
| 117 | [K].NNATVHEQVGGPSLTSDLQAQSK.[G]          | P04004         | 2382.153 |
| 118 | [R].FQSPAGTEALFELHNISVADSANYSCVYVDLKPP   | P04217         | 4630.172 |

|     |                                                 |                |          |
|-----|-------------------------------------------------|----------------|----------|
|     | FGGSAPSER.[L]                                   |                |          |
| 119 | [K].AALAAFNAQNNGSNFQLEEISR.[A]                  | P02765         | 2367.121 |
| 120 | [K].NLFLNHSENATAK.[D]                           | P00739; P00738 | 1460.702 |
| 121 | [K].ENLTAPGSDSAVFFEQGTR.[I]                     | P00450         | 2127.983 |
| 122 | [R].SQILEGLGFNLTESESDVHR.[G]                    | P29622         | 2345.162 |
| 123 | [K].SLTFNETYQDISELVYGAK.[L]                     | P01008         | 2179.044 |
| 124 | [K].LNAENNATFYFK.[I]                            | P01042         | 1432.674 |
| 125 | [R].LGHCPDPVLVNGEFSSSGPVNVSDK.[I]               | P20851         | 2612.230 |
| 126 | [K].NLFLNHSENATAK.[D]                           | P00739; P00738 | 1461.686 |
| 127 | [K].MVSHHNLTTGATLINEQWLLTTAK.[N]                | P00739; P00738 | 2696.371 |
| 128 | [K].KDPFTSYAAFVVPPIVPKDLHFKEVCNTEYK.[D]         | P68875         | 3754.883 |
| 129 | [K].LPFLQSGSLLILGPNGCGKSSIQRIIAEIWPVYN<br>K.[N] | P41909         | 4014.152 |
| 130 | [K].CGLVPVLAENYNK.[SN]                          | P02787         | 1477.736 |
| 131 | [R].LAGKPTHVNVSVVMAEVDGTCY.[-]                  | P01876         | 2348.126 |
| 132 | [K].MVSHHNLTTGATLINEQWLLTTAK.[N]                | P00739; P00738 | 2681.360 |
| 133 | [K].VTQVYAENGTVLQGSTVASVYK.[G]                  | P27169         | 2315.177 |
| 134 | [R].VYKPSAGNNSLYR.[D]                           | P02749         | 1469.738 |
| 135 | [K].NNATVHEQVGGPSLTSDLQAQSK.[G]                 | P04004         | 2383.137 |
| 136 | [R].AVNITSENLIDDVVSILR.[G]                      | P02748         | 1972.060 |
| 137 | [R].LHNMSEAMAVTAYHQYSK.[G]                      | Q8TDX9         | 2113.932 |
| 138 | [R].YAEDKFNETTEK.[S]                            | P43652         | 1475.654 |
| 139 | [K].SPDVINGSPISQK.[I]                           | P08603         | 1342.685 |
| 140 | [R].NLTTSLTESVDR.[N]                            | P80108         | 1336.659 |
| 141 | [K].AALAAFNAQNNGSNFQLEEISR.[A]                  | P02765         | 2366.137 |
| 142 | [R].LGHCPDPVLVNGEFSSSGPVNVSDK.[I]               | P20851         | 2613.214 |
| 143 | [R].SPYYNVSDEISFHCYDGYTLR.[G]                   | Q864V9         | 2587.108 |
| 144 | [K].ALGISPFHEHAEVVFTANDSGPR.[R]                 | P02766         | 2452.189 |
| 145 | [K].HQDFNSAVQLVENFCR.[N]                        | P00734         | 1964.892 |
| 146 | [K].LDAPTNLQFVNEDSTVLVR.[W]                     | P02751         | 2234.119 |
| 147 | [K].VDNALQSGNSQESVTEQDSK.[D]                    | P01834         | 2137.937 |
| 148 | [K].DIVEYYNDSNGSHVLQGR.[F]                      | P25311         | 2067.925 |
| 149 | [K].AALAAFNAQNNGSNFQLEEISR.[A]                  | P02765         | 2368.105 |
| 150 | [K].WFYIASAFRNEEYNK.[S]                         | P02763; P19652 | 1939.886 |
| 151 | [K].VPGNVTAVLGETLK.[V]                          | P01833         | 1398.784 |
| 152 | [R].FAPLNSWPDNVSLDK.[A]                         | A1AIC1         | 1704.812 |
| 153 | [R].EVNTSGFAPARPPPQPGSTTFWAWSVLR.[V]            | P0DOX3         | 3057.522 |
| 154 | [K].RNNQTIFEQTINDLTFDGSFIK.[E]                  | A1YG99         | 2603.262 |
| 155 | [K].LNAENNATFYFK.[I]                            | P01042         | 1433.658 |
| 156 | [K].FVEGSHNSTVSLTTK.[N]                         | P04114         | 1607.791 |

## Reference

- [1] H. Qi, Z. Li, H. J. Zheng, L. Fu, Q. Ji, *Chin. Chem. Lett.*, 2020, 30, 2181-2185.
- [2] B. F. Zhao, W. H. Xu, J. T. Ma, Q. Jia, *Chin. Chem. Lett.*, 2022, 34, 3.
- [3] B. F. Zhao, Y. X. Wang, J. T. Ma, Q. Jia, *Analyst*, 2022, 147, 4553-4561.
- [4] P. Su, Z. Wang, X. Li, M. Li, G. Li, Z. Gong, J. Y. Song, Y. Yang, *Anal. Bioanal. Chem.*, 2021, 413, 5267-5278.
- [5] H. M. Chen, Y. L. Li, H. Wu, N. R. Sun, C. H. Deng, *ACS Sustainable Chem. Eng.*, 2019, 7, 2844-2851.
